# Supplementary material for: Genetic Screening to Identify Candidate Resistance Alleles to Cry1F Corn in Fall Armyworm Using Targeted Sequencing
Source: Insects. 2021 Jul 8;12(7):618. doi: 10.3390/insects12070618 (PMC8303720; doi:10.3390/insects12070618)
Supplement: Supplementary file 1 [file insects-12-00618-s001.zip › Table S1.xlsx]

## Sheet: Sheet2
Table S1. List of Spodoptera frugiperda samples sequenced, their location, and their genotype for each of the SfABCC2 mutations detected as candidate Cry1F resistance alleles. Shown are the SfABCC2 reference gene coordinates, the mutation description and genotype. NA = Not available due to low sequence coverage. Non-synonymous missense mutations are highlighted in green columns, nonsense mutation…
	SfABCC2_coordinates	38	40	41	42	45	48	3421	4077	4357	4540	6020	6915	7034	7070	7120	9098	9122	9335	10491	11708	11726	12507	12748	13285
	Mutation	G13GG	T14NGGH	T14M	A15	V16GQR	G17Q	V210AC	L330F	F398V	V414A	Q627R	E700*	D740A	CMV753	A768G	Q788P	G793VR	A822V	G950	P1079L	G1085E	E1195K	S1209N	S1310T
	Type	FRAME_SHIFT	FRAME_SHIFT	NON_SYNONYMOUS_CODING	FRAME_SHIFT	FRAME_SHIFT	FRAME_SHIFT	FRAME_SHIFT	NON_SYNONYMOUS_CODING	NON_SYNONYMOUS_CODING	NON_SYNONYMOUS_CODING	NON_SYNONYMOUS_CODING	STOP_GAINED+SPLICE_SITE_REGION	FRAME_SHIFT	FRAME_SHIFT	NON_SYNONYMOUS_CODING	NON_SYNONYMOUS_CODING	FRAME_SHIFT	NON_SYNONYMOUS_CODING	FRAME_SHIFT	NON_SYNONYMOUS_CODING+SPLICE_SITE_REGION	NON_SYNONYMOUS_CODING	NON_SYNONYMOUS_CODING	NON_SYNONYMOUS_CODING	NON_SYNONYMOUS_CODING
				MISSENSE					MISSENSE	MISSENSE	MISSENSE	MISSENSE	NONSENSE			MISSENSE	MISSENSE		MISSENSE		MISSENSE	MISSENSE	MISSENSE	MISSENSE	MISSENSE
Collection location	Sample Name
Isabela	PRS_10	No mutation	No mutation	No mutation	No mutation	No mutation	No mutation	No mutation	No mutation	No mutation	No mutation	No mutation	No mutation	Homozygous	No mutation	No mutation	No mutation	No mutation	No mutation	NA	NA	NA	No mutation	No mutation	No mutation
Isabela	PRS_11	NA	NA	NA	NA	NA	NA	No mutation	No mutation	No mutation	Heterozygous	No mutation	No mutation	No mutation	No mutation	No mutation	No mutation	NA	No mutation	NA	No mutation	Heterozygous	No mutation	Heterozygous	No mutation
Isabela	PRS_12	NA	NA	NA	NA	NA	NA	No mutation	No mutation	No mutation	Heterozygous	No mutation	No mutation	No mutation	No mutation	No mutation	No mutation	NA	No mutation	NA	No mutation	No mutation	No mutation	Heterozygous	No mutation
Isabela	PRS_13	NA	NA	NA	NA	NA	NA	NA	NA	NA	NA	NA	No mutation	No mutation	No mutation	No mutation	NA	NA	NA	NA	Heterozygous	No mutation	No mutation	No mutation	No mutation
Isabela	PRS_14	No mutation	No mutation	No mutation	Heterozygous	No mutation	No mutation	No mutation	No mutation	No mutation	No mutation	No mutation	No mutation	No mutation	No mutation	No mutation	Heterozygous	No mutation	No mutation	No mutation	No mutation	No mutation	Heterozygous	No mutation	No mutation
Isabela	PRS_17	NA	NA	NA	NA	NA	NA	NA	No mutation	No mutation	No mutation	No mutation	No mutation	Heterozygous	No mutation	No mutation	NA	NA	NA	NA	No mutation	No mutation	No mutation	Heterozygous	No mutation
Isabela	PRS_18	No mutation	No mutation	No mutation	No mutation	No mutation	No mutation	No mutation	No mutation	No mutation	No mutation	No mutation	No mutation	Homozygous	No mutation	No mutation	No mutation	No mutation	No mutation	No mutation	No mutation	Heterozygous	No mutation	No mutation	No mutation
Isabela	PRS_20	No mutation	No mutation	No mutation	Heterozygous	No mutation	No mutation	No mutation	Heterozygous	No mutation	No mutation	No mutation	No mutation	No mutation	No mutation	NA	No mutation	No mutation	No mutation	No mutation	NA	NA	No mutation	No mutation	No mutation
Isabela	PRS_6	NA	NA	NA	NA	NA	NA	No mutation	No mutation	No mutation	No mutation	NA	Heterozygous	Heterozygous	No mutation	No mutation	No mutation	NA	No mutation	NA	No mutation	No mutation	No mutation	No mutation	No mutation
Isabela	PRS_7	No mutation	No mutation	No mutation	No mutation	No mutation	No mutation	No mutation	No mutation	No mutation	No mutation	No mutation	No mutation	Heterozygous	No mutation	No mutation	No mutation	No mutation	No mutation	No mutation	No mutation	No mutation	No mutation	No mutation	No mutation
Isabela	PRS_8	No mutation	No mutation	No mutation	Heterozygous	No mutation	No mutation	No mutation	No mutation	No mutation	Heterozygous	No mutation	No mutation	No mutation	No mutation	No mutation	No mutation	Heterozygous	No mutation	No mutation	No mutation	No mutation	No mutation	Heterozygous	No mutation
Isabela	PRS_9	NA	NA	NA	NA	NA	NA	NA	NA	NA	NA	NA	NA	Heterozygous	NA	NA	NA	NA	NA	NA	No mutation	No mutation	NA	No mutation	No mutation
Lajas	PRL_164	No mutation	No mutation	No mutation	Heterozygous	No mutation	No mutation	No mutation	No mutation	No mutation	No mutation	No mutation	No mutation	No mutation	No mutation	NA	No mutation	NA	No mutation	No mutation	No mutation	No mutation	No mutation	No mutation	No mutation
Lajas	PRL_165	No mutation	No mutation	No mutation	No mutation	No mutation	No mutation	No mutation	No mutation	No mutation	No mutation	No mutation	No mutation	Heterozygous	No mutation	No mutation	No mutation	Heterozygous	No mutation	No mutation	No mutation	No mutation	No mutation	No mutation	No mutation
Lajas	PRL_166	No mutation	No mutation	No mutation	Homozygous	No mutation	No mutation	No mutation	No mutation	No mutation	Heterozygous	No mutation	No mutation	No mutation	No mutation	No mutation	No mutation	Heterozygous	No mutation	NA	No mutation	Heterozygous	No mutation	Heterozygous	No mutation
Lajas	PRL_167	No mutation	No mutation	No mutation	Homozygous	No mutation	No mutation	No mutation	No mutation	No mutation	Heterozygous	No mutation	No mutation	No mutation	No mutation	Heterozygous	No mutation	Homozygous	No mutation	No mutation	No mutation	No mutation	No mutation	Heterozygous	No mutation
Lajas	PRL_168	No mutation	No mutation	No mutation	Heterozygous	No mutation	No mutation	No mutation	No mutation	No mutation	No mutation	No mutation	No mutation	Heterozygous	No mutation	No mutation	No mutation	No mutation	No mutation	No mutation	No mutation	No mutation	No mutation	No mutation	No mutation
Lajas	PRL_169	No mutation	No mutation	No mutation	No mutation	No mutation	No mutation	No mutation	No mutation	No mutation	No mutation	No mutation	No mutation	Heterozygous	No mutation	No mutation	No mutation	No mutation	No mutation	No mutation	No mutation	No mutation	Heterozygous	No mutation	No mutation
Lajas	PRL_170	No mutation	No mutation	No mutation	Heterozygous	No mutation	No mutation	No mutation	No mutation	No mutation	No mutation	No mutation	No mutation	Heterozygous	No mutation	NA	No mutation	No mutation	No mutation	NA	NA	No mutation	No mutation	No mutation	No mutation
Lajas	PRL_171	No mutation	No mutation	No mutation	Heterozygous	No mutation	No mutation	No mutation	No mutation	No mutation	No mutation	No mutation	No mutation	Heterozygous	No mutation	Heterozygous	No mutation	No mutation	No mutation	No mutation	No mutation	No mutation	No mutation	No mutation	No mutation
Lajas	PRL_172	No mutation	No mutation	No mutation	No mutation	No mutation	No mutation	No mutation	No mutation	No mutation	No mutation	No mutation	No mutation	Homozygous	No mutation	No mutation	No mutation	No mutation	No mutation	NA	NA	Heterozygous	No mutation	No mutation	No mutation
Lajas	PRL_173	No mutation	No mutation	No mutation	No mutation	No mutation	No mutation	No mutation	No mutation	No mutation	No mutation	No mutation	No mutation	Homozygous	No mutation	NA	No mutation	No mutation	No mutation	No mutation	No mutation	No mutation	No mutation	No mutation	No mutation
Lajas	PRL_174	No mutation	No mutation	No mutation	Homozygous	No mutation	No mutation	Heterozygous	No mutation	No mutation	Heterozygous	No mutation	No mutation	No mutation	No mutation	No mutation	No mutation	Homozygous	No mutation	No mutation	NA	NA	No mutation	Heterozygous	No mutation
Lajas	PRL_175	No mutation	No mutation	No mutation	Heterozygous	No mutation	No mutation	No mutation	No mutation	No mutation	Heterozygous	No mutation	No mutation	No mutation	No mutation	No mutation	No mutation	No mutation	No mutation	No mutation	No mutation	No mutation	No mutation	Heterozygous	No mutation
Lajas	PRL_176	No mutation	No mutation	No mutation	Homozygous	No mutation	No mutation	No mutation	No mutation	No mutation	No mutation	No mutation	No mutation	No mutation	No mutation	No mutation	NA	NA	No mutation	NA	No mutation	No mutation	No mutation	No mutation	No mutation
Lajas	PRL_177	No mutation	No mutation	No mutation	No mutation	No mutation	No mutation	No mutation	No mutation	No mutation	No mutation	No mutation	No mutation	Homozygous	No mutation	No mutation	No mutation	No mutation	No mutation	NA	NA	No mutation	No mutation	No mutation	No mutation
Lajas	PRL_178	No mutation	No mutation	Homozygous	No mutation	Homozygous	Homozygous	No mutation	No mutation	No mutation	No mutation	No mutation	No mutation	Heterozygous	No mutation	No mutation	NA	NA	No mutation	NA	No mutation	Heterozygous	No mutation	No mutation	No mutation
Santa Isabel	PRSI_1	No mutation	No mutation	Heterozygous	Heterozygous	Heterozygous	Heterozygous	No mutation	No mutation	No mutation	No mutation	Heterozygous	No mutation	No mutation	No mutation	NA	No mutation	No mutation	No mutation	No mutation	No mutation	Heterozygous	No mutation	No mutation	No mutation
Santa Isabel	PRSI_10	No mutation	No mutation	No mutation	No mutation	No mutation	No mutation	No mutation	No mutation	No mutation	No mutation	No mutation	No mutation	No mutation	No mutation	No mutation	No mutation	Heterozygous	Heterozygous	Heterozygous	No mutation	Heterozygous	No mutation	No mutation	Heterozygous
Santa Isabel	PRSI_11	No mutation	Heterozygous	No mutation	Homozygous	No mutation	No mutation	No mutation	Heterozygous	No mutation	No mutation	No mutation	No mutation	No mutation	No mutation	NA	No mutation	No mutation	No mutation	No mutation	No mutation	Heterozygous	No mutation	No mutation	No mutation
Santa Isabel	PRSI_12	No mutation	No mutation	Heterozygous	Heterozygous	Heterozygous	Heterozygous	No mutation	No mutation	No mutation	No mutation	No mutation	No mutation	No mutation	No mutation	No mutation	No mutation	No mutation	No mutation	No mutation	No mutation	Heterozygous	No mutation	No mutation	No mutation
Santa Isabel	PRSI_13	No mutation	No mutation	Heterozygous	Heterozygous	Heterozygous	Heterozygous	No mutation	No mutation	No mutation	No mutation	No mutation	No mutation	No mutation	No mutation	No mutation	No mutation	No mutation	No mutation	No mutation	No mutation	Heterozygous	No mutation	No mutation	No mutation
Santa Isabel	PRSI_14	No mutation	No mutation	No mutation	No mutation	No mutation	No mutation	No mutation	No mutation	No mutation	No mutation	No mutation	No mutation	No mutation	Heterozygous	No mutation	No mutation	No mutation	No mutation	NA	No mutation	No mutation	No mutation	No mutation	No mutation
Santa Isabel	PRSI_15	No mutation	No mutation	No mutation	Heterozygous	No mutation	No mutation	No mutation	No mutation	No mutation	No mutation	No mutation	No mutation	No mutation	No mutation	No mutation	No mutation	No mutation	Heterozygous	No mutation	NA	No mutation	No mutation	No mutation	No mutation
Santa Isabel	PRSI_2	NA	NA	NA	NA	NA	NA	NA	No mutation	No mutation	Heterozygous	No mutation	No mutation	No mutation	No mutation	No mutation	No mutation	Heterozygous	No mutation	No mutation	No mutation	No mutation	No mutation	Heterozygous	No mutation
Santa Isabel	PRSI_4	No mutation	No mutation	No mutation	Homozygous	No mutation	No mutation	No mutation	No mutation	No mutation	Heterozygous	No mutation	No mutation	No mutation	No mutation	Heterozygous	No mutation	Heterozygous	No mutation	No mutation	No mutation	No mutation	No mutation	Heterozygous	No mutation
Santa Isabel	PRSI_5	No mutation	No mutation	No mutation	No mutation	No mutation	No mutation	No mutation	No mutation	No mutation	No mutation	No mutation	No mutation	Heterozygous	No mutation	NA	No mutation	No mutation	No mutation	No mutation	NA	No mutation	No mutation	No mutation	No mutation
Santa Isabel	PRSI_6	No mutation	No mutation	No mutation	No mutation	No mutation	No mutation	No mutation	No mutation	No mutation	No mutation	No mutation	No mutation	Heterozygous	No mutation	No mutation	No mutation	No mutation	No mutation	No mutation	NA	No mutation	No mutation	No mutation	No mutation
Santa Isabel	PRSI_7	Heterozygous	No mutation	No mutation	Heterozygous	No mutation	No mutation	No mutation	No mutation	No mutation	No mutation	No mutation	No mutation	No mutation	No mutation	NA	No mutation	No mutation	No mutation	No mutation	No mutation	NA	No mutation	No mutation	No mutation
Santa Isabel	PRSI_8	No mutation	No mutation	No mutation	Heterozygous	No mutation	No mutation	No mutation	No mutation	No mutation	No mutation	No mutation	No mutation	No mutation	No mutation	No mutation	No mutation	No mutation	Heterozygous	No mutation	No mutation	No mutation	No mutation	No mutation	No mutation
Santa Isabel	PRSI_9	No mutation	No mutation	No mutation	No mutation	No mutation	No mutation	No mutation	No mutation	Heterozygous	No mutation	No mutation	No mutation	Homozygous	No mutation	No mutation	No mutation	No mutation	No mutation	NA	NA	No mutation	No mutation	No mutation	No mutation
