# Supplementary material for: Genetic Screening to Identify Candidate Resistance Alleles to Cry1F Corn in Fall Armyworm Using Targeted Sequencing
Source: Insects. 2021 Jul 8;12(7):618. doi: 10.3390/insects12070618 (PMC8303720; doi:10.3390/insects12070618)
Supplement: Supplementary file 1 [file insects-12-00618-s001.zip › Table S2.xlsx]

## Sheet: Sheet2
Sorter	Sort	Forward/Reverse Primers
1	001F	TTCGTTACTAAGCGGTTTTGGA
2	001R	ATTCAGATCGGGTACTAGTCATGG
3	002F	TTGAGGAGAACTTGCTGTTGG
4	002R	TTTCAGGACGGATGCTTTGA
5	003F	TAATGGTGTTCAGTCGATGC
6	003R	TTTACCAGAGACATTATTAAGATTGAA
7	004F	GAATTGTTTTCTGGATCAAAGC
8	004R	CCCAGTCCTAGTAATGTCACTGC
9	005F	ATCAATATTTAGACTTACTGAGGATCG
10	005R	TATCATTAAAGGTGGAACTAAAGGAGA
11	006F	AATTTTATTTGAGCGGAGGATGG
12	006R	ATCTATTTTGTTACCCTAATTGAAAGC
13	007F	TGACGTTGTCCCATTGAGAAG
14	007R	TATACAAATGGTACAAGGGAACA
15	008F	TCGAGGGCTGGTATACTCTCCT
16	008R	AAGTCCATATTTTATTTTCTATTGTGA
17	009F	GAGACAGAGCAGTAAGCTTTCAA
18	009R	TTGGAGAGCATTGGAACAGG
19	010F	GGGTCATATTATGTTCCCTTGTACC
20	010R	TCGCTGCGTTACAATCTGGA
21	011F	TCATTGAGCTTGATTTGTATCAC
22	011R	TCAAAAATATCAATAATTCCGCAAGA
23	012F	TCATCGTTGTAGTTGTCGAATGG
24	012R	ACATCGCTAATTTACACAGTGA
25	013F	TTCTTGGCAATTCCTTGAG
26	013R	AAAATACGTTGAGAAAATGGAA
27	014F	TAATGTCGCTGAGCCGGAAC
28	014R	AAACGACCGTATTCGAAACTTTG
29	015F	GTTCTGCCAACTACTCCGACCT
30	015R	TTTCGTACCTACCTACTGTTCTAATGG
31	016F	TTGAAAAGAAACAAAGATCCCAAA
32	016R	TTCTCCTGACGACCCACCTG
33	017F	TTCAAAAATAACCATTAGAACAGTAGG
34	017R	ACCAAAGGGATGGCCAAGT
35	018F	AAAGTTCAAGTCCTTCAGTACAGGTG
36	018R	AAAAATATCGAAACGTGCGGAAT
37	019F	ACACGTTTGAGAACGTCACCTC
38	019R	AAACGCAACTATGGCACAGGA
39	020F	ATAGTTTATTCCGCACGTTTCG
40	020R	CAACGTGTAGCGGGTTCGAT
41	021F	TTCACATACACATAACACCCAGACC
42	021R	TTTGTTTATAAGTAGATACCCGTGA
43	022F	GTGGACACAAAGAATTGCTC
44	022R	TTTTGAGGTAGAAATTGGCATTG
45	023F	ACAGTTGCCCAGCCTCCAC
46	023R	CCTACCGAAGAAAACATGGAGA
47	024F	GGTACTATTTTACATAAATCACGGGTA
48	024R	CTTCTTGGGACAGATGACAGC
49	025F	TTAATAATATGCAATGCCAATTTC
50	025R	TGGTGCTGACCATGATGTTG
51	026F	ATCTCTTACGTCCAGTCTCCATGTT
52	026R	CTCGCAGGTGAGCTGATACC
53	027F	ACTCGTGTTTAATCACATTAACCGTA
54	027R	TTCGGTCTGTACCTGGACACC
55	028F	TTCGAATACTAGACGTTTAAATATGAT
56	028R	TCTCCATACTAGCGCTTTCTACACG
57	029F	TCGTAAAGAATCACTTACCGAAATCA
58	029R	TGGGTCAGTGATATACTAGTTTTCTTA
59	030F	TGATAATTCCGAGGTAGATTAAACA
60	030R	AAATCGGTTCAATTCCTTTG
61	031F	GGTTGAACCACCCAAAAAC
62	031R	ATGCACAGGTGAGCATTTCA
63	032F	AATCTTAGATAATTTCAAAGGAATTGA
64	032R	ATTTCCAGCTAAGAGTCCCGTGT
65	033F	GTTTAGAAGTCGGTCCTGAGAGTTG
66	033R	TTTTTATTACTTGTGCTTTCATTGTCG
67	034F	AGAGTTGATCATTCCAAACACG
68	034R	AAGGAACTAGTAAGTATCCCATA
69	035F	ACCAGCGACAATGAAAGCAC
70	035R	AGCCTTACCTTGGACATTGATACC
71	036F	GAAGAACTACTCGTTTGTAAATATGG
72	036R	TGTTCAGATGTACCTGTCTCTAGCC
73	037F	AATCGTTTCACAGCTTGAGCA
74	037R	TGGGTGCTATGGATGAGCTG
75	038F	GCGTTCAGCACAAGGACACT
76	038R	CAAAAATAGACACGGTATTTGCAT
77	039F	AACATGCTTCGCGGCAAC
78	039R	TCACTTGAAATGATTATGTCAGAAAA
79	040F	TGTTCAATACACGACCTGTGAGA
80	040R	TGTGTGTGATTATGCCCCCTAA
81	041F	AATCTAGACCAATACAATATATGCAA
82	041R	TCTATAATGCTTTTCAACTTAGAGAAT
83	042F	TAAAACGGCATTATTTTCTGACA
84	042R	CAATGAATGCAGAGGCCAAA
85	043F	TTATGGGATTATATTAATTACTTAGGG
86	043R	CCTTACTGTCATTGAGTCTTAACTTTT
87	044F	TTGTGCAGTGTAATAACCTTCGTT
88	044R	CAGTAACCAAGCCAACATTGTA
89	045F	ACTTCAGCAATTGTAGATACTTAAAAC
90	045R	CAATTTGTTAACGACTGACATCTG
91	046F	TTAAATGGAATGGAGAGATGTT
92	046R	ATCGGGTAAGTGCAAATCAA
93	047F	TGCAGTTCTTTATCTTATTTTTAGTTT
94	047R	CGAGAAATTGATAGTGGCTGTAATGA
95	048F	TTTTTATCCGTCAGATGTCAGTCGT
96	048R	TCGTAGTGATGACTATGCGAGCTT
97	049F	AACGTTAAAAGAGCAAAGTTCAA
98	049R	CGGCAGCGTAGTACTAGCCATT
99	050F	GGATTGGTATCGAAAAATCTCA
100	050R	AATTGAACACTCAAGTAGGTCTG
101	051F	AGGATCTGAAACATAATACAAATAAGT
102	051R	ACTAACCAGGTGGATGGA
103	052F	TCCTTCGGGTAAAGTTTGTATG
104	052R	TGCCACCACTACCGACTACTG
105	053F	TTCAATTAGAACAAAGAAAAACAAA
106	053R	TGGTGCATGGTGGTAATGG
107	054F	TCCTTACCAGAAACTAAGCCAGT
108	054R	AAGGTGAGGAGAAGGTTCAA
109	055F	GTGATCACCAACACGAGGA
110	055R	CCAGCAATGATGCGAGGAAT
111	056F	GACTTCATGTACCTCCCAAG
112	056R	TGACCTGTGCTTTAGCTAATATTGATT
113	057F	TGTCTCTCTTCGGCCTCCA
114	057R	TCGGACTGAGAACGAATCTATTTC
115	058F	GTCACTCTTGACTGACATCTTTG
116	058R	TTATGTAGCGTACAGTCTGCAA
117	059F	GGCCTTCAATTACTGCAACGA
118	059R	CGAACACACAAACAAATAAAATAAACG
119	060F	GTTACCTCGGGCTTGCAGAC
120	060R	TTGCCAGAAAACAGCTTTCAA
121	061F	TTCCGTAATGGGAAATATTCTAA
122	061R	TGCTCGCTTAATACCAGCTA
123	062F	TGTCGGGTGAAATACGAACG
124	062R	CTGCTCTCTGACCAAGCTAGTG
125	063F	TTGTTCAGCGATGTAGACAAGA
126	063R	TGGGCTCGTATGATGAACTAATG
127	064F	TTTTGTCAGTGTCAGAGCCTTCA
128	064R	CCCTTCTACGTAGGTAAACAGCA
129	065F	GAGAATTCCGTTCCAGTTTTC
130	065R	TTGTTATGTACTAAAAAGGCTCCA
131	066F	TCGACGGAACCCTGTGGATA
132	066R	AAGAATAATGACTCGTAATGTTTCAC
133	067F	TTCCTTATGAGTGAAACATTACGAGTC
134	067R	CGAGGTAAGTCTGACTCCTACAAACA
135	068F	TAATAATATTTGTCATTGAAACGAG
136	068R	TGGTCACCCACCAAATTCAC
137	069F	AGTGTTTTTACAGGTATTGAAAAGAT
138	069R	ACTATTCGACGGCTGCATCA
139	070F	ATTGTTCGCTTATCTTATGTTTGTAGG
140	070R	TGACGATCCTCTATCGGCTGT
141	071F	GGATGCATGTCTTGCCACTG
142	071R	TTGTTCATACTAGAAGGCACATCTACA
143	072F	TGCCGACGTTTGCGTCTA
144	072R	AAATTAGATGGAAATGAAACCGTCT
145	073F	GCCTGTAACAAATATGTTTAGAATTA
146	073R	AAACACGCGCAAAAAGACA
147	074F	TCGACTGCTCTGTAGATGTGC
148	074R	CTGATAAGGTTAATCGTTGATTT
149	075F	TTTGTATTTTCTAGCCATAGACGGTTT
150	075R	CTTACAAGAACAATGCGCTATCTCC
151	076F	GATTCTGTTATTATTAAATCAACGAT
152	076R	CAGGCAATCTTAGGGTTGACTTCT
153	077F	ATACTATTGAAGGAGATAGCGCATTG
154	077R	AATTAAATAGTGGTACACAAGGCGAAC
155	078F	AACAATTGCATATCTTCTTGGT
156	078R	AGGACATAAACTCATGTACCTACTTA
157	079F	AAAACAATAAGAAGTCAACCCTAAGA
158	079R	CAGAGGGCCAGGATCAATTT
159	080F	GACATTAAGTTCGCCTTGTG
160	080R	CGGTGACTTGTCTCTGGTTGG
161	081F	ACTCACCTCGCGGTAGACAG
162	081R	CCAGCAGGCACGGTGTATTT
163	082F	ACCAGACAGTGACACACCT
164	082R	ATGGCAAGAGTCAATTTTCC
165	083F	GGGAACTGCTTAAAGTCTGG
166	083R	AAATTTCGCCATGCAACAGC
167	084F	TACAATTTTCGCCTGGCTGTT
168	084R	AGAACATTCTGTTTGGTTTGGAA
169	085F	ACAGTTCAGGGCAGCCGTTG
170	085R	CTACGCTAGTCAGGAGCCTTGG
171	086F	TTGAAACACCATACATTCAACAACAA
172	086R	TTTTGCGAGAGTTGCCAGTG
173	087F	TGCCTCTTTATATTTGGCGACATT
174	087R	TAATTTATTTCCTTGGTTCCAGACC
175	088F	GCACAGTCGCAGGGAACAG
176	088R	TGCTCGATACCTAAATCAAAATGG
177	089F	TGCTGAGATTGCCGCTAGTC
178	089R	CAAAAATAAACTATGCGCTGT
179	090F	AGAGAGGTCTGGAACCAAGGAA
180	090R	CCTCAATGATAACAAAGAGATGACA
181	091F	AAATAAATAAATGAGACCATTTTGA
182	091R	ATGGCCGACTATCCTGTGC
183	092F	TACCTTTCCTGATCCCACAGG
184	092R	TGAAGCGAATATGGCCAGACC
185	093F	GAACACGTAAAGATATGTTCTTGAG
186	093R	AGGGAGGCCTCGAGACTG
187	094F	GCCCATGTTGCATTAACT
188	094R	CCAAAAGTGGTGAATGGTGCT
189	095F	TTTTGTTGGCAGCACAATGC
190	095R	CTTGAGGTACCTACGAGTTTATCA
191	096F	TGTCTGAACGCTCGTCTGTT
192	096R	TGAGATGTTGATATCCTTGGAACG
193	097F	TCAATACAATAACCAATAGAACAATGA
194	097R	TGAACGTTACCCTCATTTTACCG
195	098F	ATGTCACGATAGAAACTAATACAAGAA
196	098R	AACGGTGTGTTGTTGTTTCCA
197	099F	AAAAGGAGAAATCCCTGA
198	099R	TTCGCATTATTCGACTGTTGTTC
199	100F	GCAAACGCCATCGGTAAAAT
200	100R	CTGACTCTAGCGCTGACTGG
201	101F	GAAGTATTGTTGGATGGGATA
202	101R	TGTTCCTCGGGTTCATGTTG
203	102F	AACACTTTCAAAGAACAACAGTC
204	102R	TCGTGCGTATGAAATGAGTGC
205	103F	GAGTGGCACTAATCATGTTTCCA
206	103R	TCAAAATGTACGCTTGGGAGAA
207	104F	AGAAACATGACACTTCGCTCA
208	104R	AAGGAAATGGCTTAAATAGAGTAAAA
209	105F	GCTCCTGATGAAGATAGACTTCC
210	105R	TGAATTTGCTACTACTGCTTTAAGAAA
211	106F	TCACCACTAGCTGGAAGGGTTT
212	106R	CTTATGAGTGAAATTATCAACGGTA
213	107F	TGTCAGTCCTCTTAGCTGTCATCC
214	107R	CCTGAATTTTCTCCTTTTCCTTC
215	108F	TTTTGTTAGACCGGCTGCAAT
216	108R	TCAAGGTACTTGATAGTTATGACTCAA
217	109F	TTCAAAGCACTAAGTTATTAGAGAGAA
218	109R	CGCCATATGTCGGTCTC
219	110F	TGGCATGATTAAAATGATGACTCCAA
220	110R	CGACGTCGCCGGTGGAAAGT
221	111F	AGCAGCATCATAAACGAAG
222	111R	CCAGTTGTATCATTGGTTACAGTTGC
223	112F	ACAGGTAGTGTAGGAACATGA
224	112R	CTCGTTTTAAGCCCATCACAA
225	113F	GACAGCAAGTTCACTAACTTTCCA
226	113R	CGCGAATGAATCAACCAATC
227	114F	TGCGGAGCAACTGTAACCAA
228	114R	CGTTGAACGAAATCGAAACAA
229	115F	TGGAGAGAACATTGTGAATTGTGA
230	115R	ACAATTGTGTTTGATCAGTACCCTTA
231	116F	TGTTTCACGAGATCAAAACG
232	116R	TTCGGACATTAGACATTGATTACG
233	117F	TTCTTTATAAATTGACAGAGATAGCA
234	117R	TTGTTCGTCATGCGGTTCAG
235	118F	GAGTAGCATTTCAGTATTCCGATCT
236	118R	CCATGTTGGGGATCAACTT
237	119F	GGCGATTTTGACTTTCATACTG
238	119R	ATTAACAGGACAGCTCAGCCATT
